# Supplementary material
Source: publisher figshare collection journal article supplement (https://future-science-group.figshare.com/ndownloader/files/30904789)
Supplement: Supplementary file 1 [file 30904789]

| **Supplementary Table 1**. Index total knee arthroplasty coding. | |
| --- | --- |
| **Code Type** | **Description** |
| **ICD-10 Procedure Code:** | **Total Hip Arthroplasty** |
| 0SR9019 | Replacement of Right Hip Joint with Metal Synthetic Substitute, Cemented, Open Approach |
| 0SR901A | Replacement of Right Hip Joint with Metal Synthetic Substitute, Uncemented, Open Approach |
| 0SR901Z | Replacement of Right Hip Joint with Metal Synthetic Substitute, Open Approach |
| 0SR9029 | Replacement of Right Hip Joint with Metal on Polyethylene Synthetic Substitute, Cemented, Open Approach |
| 0SR902A | Replacement of Right Hip Joint with Metal on Polyethylene Synthetic Substitute, Uncemented, Open Approach |
| 0SR902Z | Replacement of Right Hip Joint with Metal on Polyethylene Synthetic Substitute, Open Approach |
| 0SR9039 | Replacement of Right Hip Joint with Ceramic Synthetic Substitute, Cemented, Open Approach |
| 0SR903A | Replacement of Right Hip Joint with Ceramic Synthetic Substitute, Uncemented, Open Approach |
| 0SR903Z | Replacement of Right Hip Joint with Ceramic Synthetic Substitute, Open Approach |
| 0SR9049 | Replacement of Right Hip Joint with Ceramic on Polyethylene Synthetic Substitute, Cemented, Open Approach |
| 0SR904A | Replacement of Right Hip Joint with Ceramic on Polyethylene Synthetic Substitute, Uncemented, Open Approach |
| 0SR904Z | Replacement of Right Hip Joint with Ceramic on Polyethylene Synthetic Substitute, Open Approach |
| 0SR90J9 | Replacement of Right Hip Joint with Synthetic Substitute, Cemented, Open Approach |
| 0SR90JA | Replacement of Right Hip Joint with Synthetic Substitute, Uncemented, Open Approach |
| 0SR90JZ | Replacement of Right Hip Joint with Synthetic Substitute, Open Approach |
| 0SRB019 | Replacement of Left Hip Joint with Metal Synthetic Substitute, Cemented, Open Approach |
| 0SRB01A | Replacement of Left Hip Joint with Metal Synthetic Substitute, Uncemented, Open Approach |
| 0SRB01Z | Replacement of Left Hip Joint with Metal Synthetic Substitute, Open Approach |
| 0SRB029 | Replacement of Left Hip Joint with Metal on Polyethylene Synthetic Substitute, Cemented, Open Approach |
| 0SRB02A | Replacement of Left Hip Joint with Metal on Polyethylene Synthetic Substitute, Uncemented, Open Approach |
| 0SRB02Z | Replacement of Left Hip Joint with Metal on Polyethylene Synthetic Substitute, Open Approach |
| 0SRB039 | Replacement of Left Hip Joint with Ceramic Synthetic Substitute, Cemented, Open Approach |
| 0SRB03A | Replacement of Left Hip Joint with Ceramic Synthetic Substitute, Uncemented, Open Approach |
| 0SRB03Z | Replacement of Left Hip Joint with Ceramic Synthetic Substitute, Open Approach |
| 0SRB049 | Replacement of Left Hip Joint with Ceramic on Polyethylene Synthetic Substitute, Cemented, Open Approach |
| 0SRB04A | Replacement of Left Hip Joint with Ceramic on Polyethylene Synthetic Substitute, Uncemented, Open Approach |
| 0SRB04Z | Replacement of Left Hip Joint with Ceramic on Polyethylene Synthetic Substitute, Open Approach |
| 0SRB0J9 | Replacement of Left Hip Joint with Synthetic Substitute, Cemented, Open Approach |
| 0SRB0JA | Replacement of Left Hip Joint with Synthetic Substitute, Uncemented, Open Approach |
| 0SRB0JZ | Replacement of Left Hip Joint with Synthetic Substitute, Open Approach |
| **APPICD-10 Procedure Code:** | **Robotic-arm Assisted** |
| 8E0Y0CZ | Robotic Assisted Procedure of Lower Extremity, Open Approach |
| **CPT Code:** | **Knee Computed Tomography Scan** |
| 72192 | Computed tomography, pelvis; without contrast material |
| 72193 | Computed tomography, pelvis; with contrast material(s) |
| 72194 | Computed tomography, pelvis; without contrast material, followed by contrast material(s) and further sections |
| 74176 | Computed tomography, abdomen and pelvis; without contrast material |
| 74177 | Computed tomography, abdomen and pelvis; with contrast material(s) |
| 74178 | Computed tomography, abdomen and pelvis; without contrast material in one or both body regions, followed by contrast material(s) and further sections in one or both body regions |
